# Supplementary material for: Comparative Analysis and Structural Modeling of Elaeis oleifera FAD2, a Fatty Acid Desaturase Involved in Unsaturated Fatty Acid Composition of American Oil Palm
Source: MDPI journal article supplement (doi:10.3390/biology11040529), 2022-03-30
Supplement: s1 [file s1]

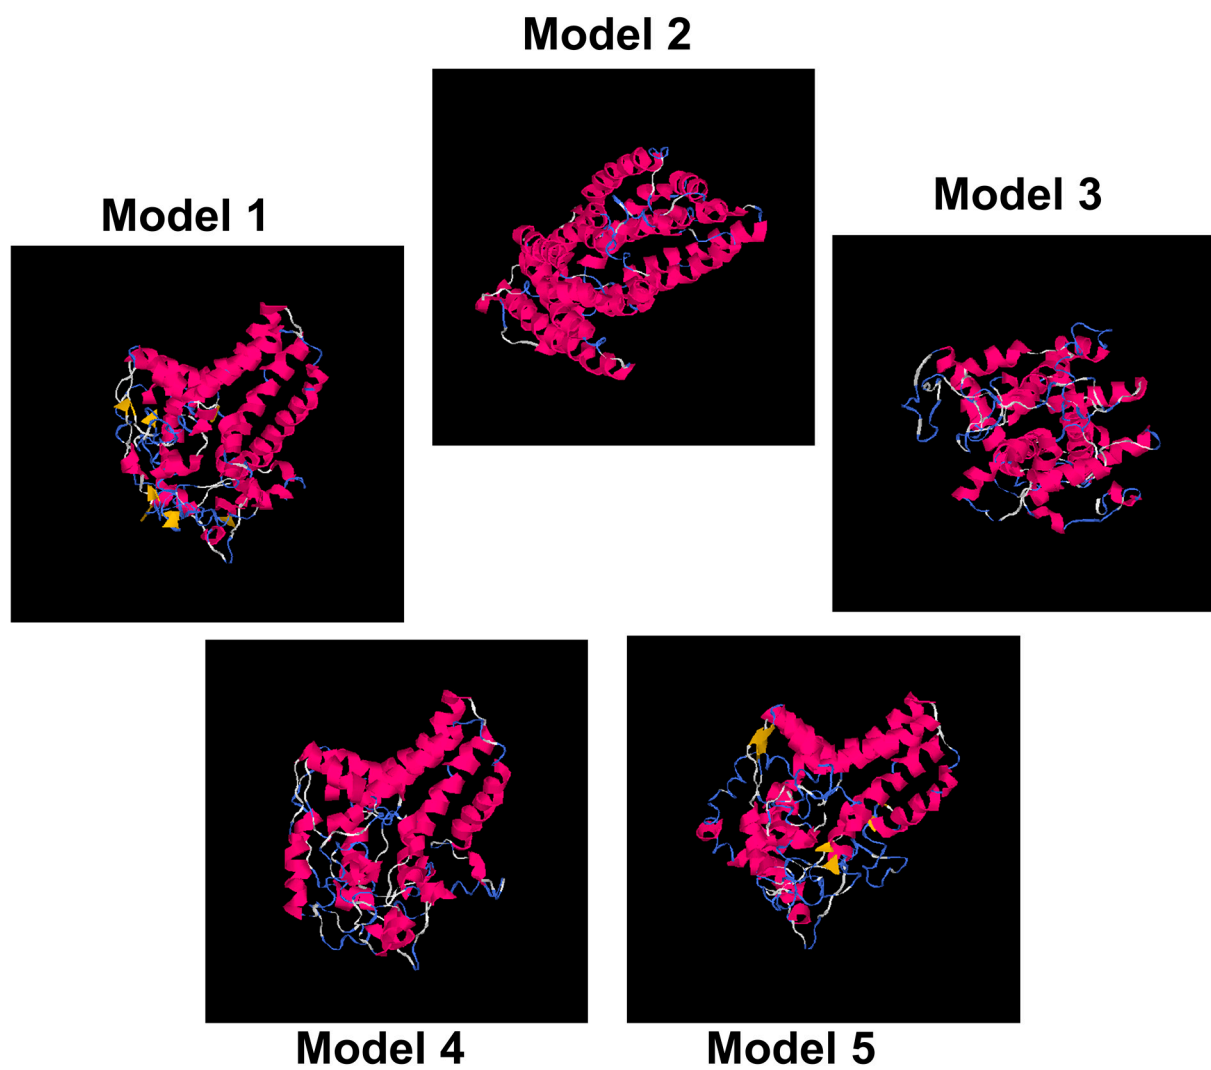

**Figure S1.** Five models were predicted using the I-TASSER tool.

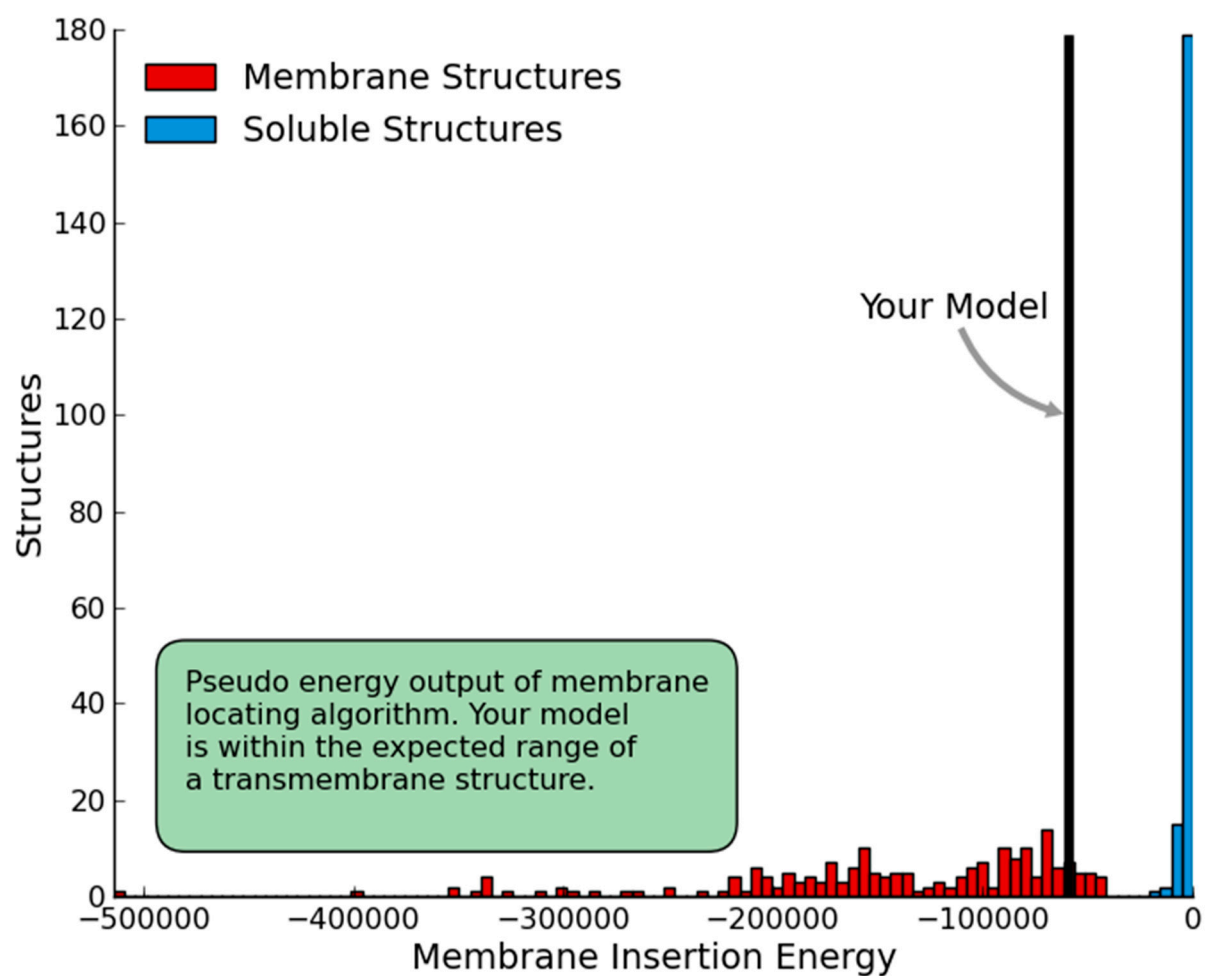

**Figure S2.** Energy minimization using OPLS-AA was performed on the initial structure obtained from I-TASSER to correct any bond-clashes and refine the stereochemistry of the predicted best protein model.
